# Supplementary material for: Effects of temperature, concentration, and isomer on the hydration structure in monosaccharide solutions
Source: Royal Society of Chemistry journal article supplement (doi:10.1039/c7cp02392h), 2017-01-01
Supplement: c7cp02392h1.pdf [file c7cp02392h1.pdf]

# Supporting Information for “Effects of temperature, concentration, and isomer on the hydration structure in monosaccharide solutions”

Katsufumi Tomobe<sup>1</sup>, Eiji Yamamoto<sup>2</sup>, Masato Yasui<sup>3</sup>,  
and Kenji Yasuoka<sup>1</sup>

<sup>1</sup> Department of Mechanical Engineering, Keio University, 3-14-1 Hiyoshi,  
Kohoku-ku, Yokohama 223-8522, Japan

<sup>2</sup> Graduate School of Science and Technology, Keio University, 3-14-1 Hiyoshi,  
Kohoku-ku, Yokohama 223-8522, Japan

<sup>3</sup> Department of Pharmacology, School of Medicine, Keio University, Shinanomachi,  
Shinjuku-ku, 160-8582, Japan

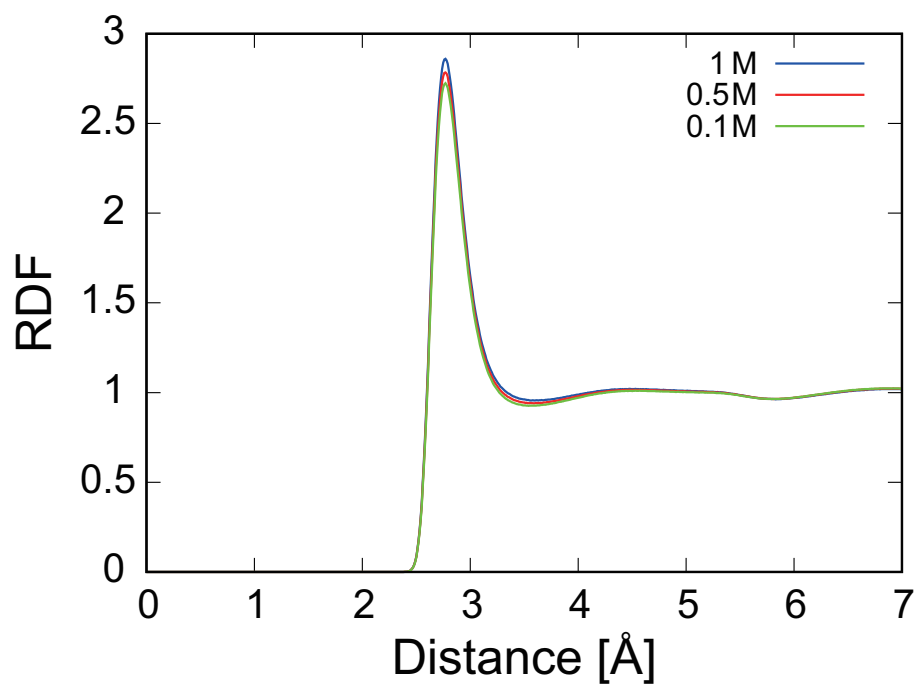

Figure S1: **RDFs of water oxygen-oxygen.** Green, red, and blue lines show  $\alpha$ -D-glucose solution at 0.1, 0.5, and 1 M, respectively.

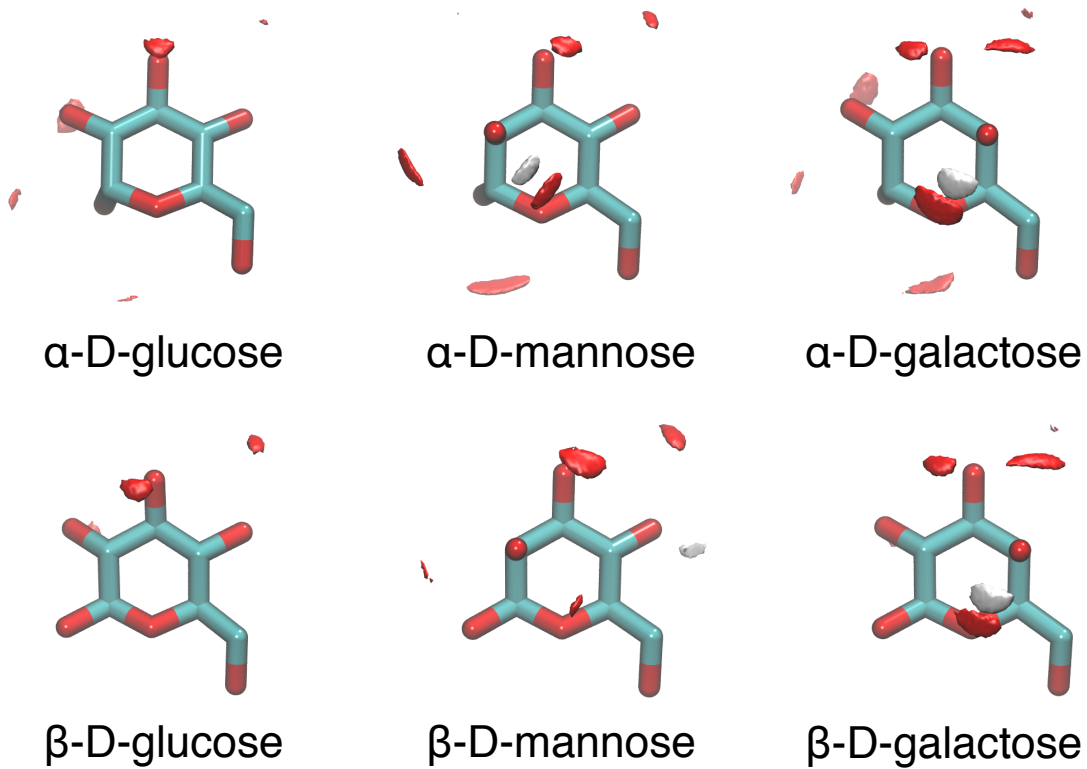

Figure S2: **SDFs of water molecules around each monosaccharide.** Only higher-value regions (more than 8.5 and 7.5 for oxygen and hydrogen atoms, respectively) are shown. The field is approximated on a square mesh with 0.1 Å mesh resolution.

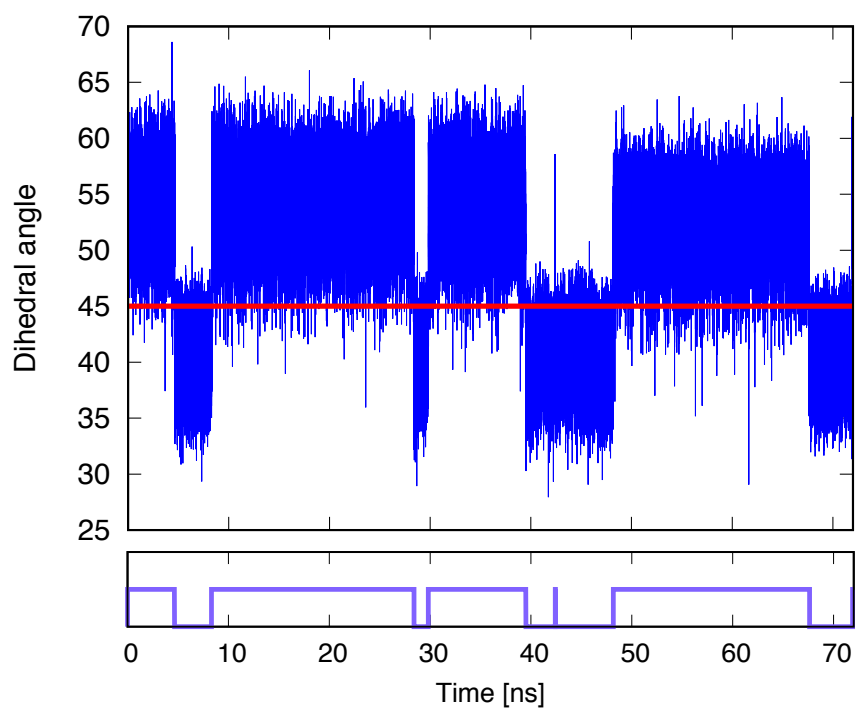

Figure S3: **Definition of the boat conformer.** Upper shows dihedral angle of a monosaccharide as a function of time with the threshold  $45^\circ$ . Lower shows the boat states during the simulation. The results show that our definition clearly separated two monosaccharide conformers.

Table S1: Average lifetime, content, and free energy change of the conformers in  $\alpha$ -D-glucose.

| Temperature [K] | Concentration [M] | Lifetime [ns] | Content [%] | $\Delta G$ [kcal/mol] |
|-----------------|-------------------|---------------|-------------|-----------------------|
| 298             | 0.1               | 3.31          | 6.61        | 0.681                 |
| 298             | 0.5               | 3.46          | 6.29        | 0.694                 |
| 298             | 1.0               | 3.69          | 5.99        | 0.708                 |
| 310             | 1.0               | 2.58          | 7.58        | 0.669                 |
| 320             | 1.0               | 2.15          | 8.64        | 0.651                 |
| 330             | 1.0               | 1.54          | 9.23        | 0.651                 |
| 340             | 1.0               | 1.02          | 9.80        | 0.651                 |
| 350             | 1.0               | 0.96          | 10.9        | 0.634                 |

Table S2: Average lifetime, content, and free energy change of the conformers in  $\alpha$ -D-mannose.

| Temperature [K] | Concentration [M] | Lifetime [ns] | Content [%] | $\Delta G$ [kcal/mol] |
|-----------------|-------------------|---------------|-------------|-----------------------|
| 298             | 0.1               | 0.56          | 4.10        | 0.810                 |
| 298             | 0.5               | 0.67          | 4.26        | 0.800                 |
| 298             | 1.0               | 0.63          | 4.06        | 0.813                 |
| 310             | 1.0               | 0.40          | 4.71        | 0.804                 |
| 320             | 1.0               | 0.38          | 5.30        | 0.796                 |
| 330             | 1.0               | 0.30          | 5.96        | 0.785                 |
| 340             | 1.0               | 0.25          | 6.32        | 0.791                 |
| 350             | 1.0               | 0.20          | 6.59        | 0.801                 |

Table S3: Average lifetime, content, and free energy change of the conformers in  $\alpha$ -D-galactose.

| Temperature [K] | Concentration [M] | Lifetime [ns] | Content [%] | $\Delta G$ [kcal/mol] |
|-----------------|-------------------|---------------|-------------|-----------------------|
| 298             | 0.1               | 9.14          | 6.09        | 0.703                 |
| 298             | 0.5               | 1.06          | 0.71        | 1.27                  |
| 298             | 1.0               | 6.60          | 4.18        | 0.805                 |
| 310             | 1.0               | 4.99          | 6.41        | 0.717                 |
| 320             | 1.0               | 3.67          | 7.15        | 0.708                 |
| 330             | 1.0               | 2.72          | 8.04        | 0.694                 |
| 340             | 1.0               | 2.04          | 9.00        | 0.679                 |
| 350             | 1.0               | 1.59          | 9.43        | 0.683                 |

Table S4: Average lifetime, content, and free energy change of the conformers in  $\beta$ -D-glucose.

| Temperature [K] | Concentration [M] | Lifetime [ns] | Content [%] | $\Delta G$ [kcal/mol] |
|-----------------|-------------------|---------------|-------------|-----------------------|
| 298             | 0.1               | 0.24          | 0.28        | 1.51                  |
| 298             | 0.5               | 0.28          | 0.36        | 1.45                  |
| 298             | 1.0               | 0.22          | 0.25        | 1.54                  |
| 310             | 1.0               | 0.18          | 0.38        | 1.50                  |
| 320             | 1.0               | 0.15          | 0.48        | 1.47                  |
| 330             | 1.0               | 0.12          | 0.57        | 1.47                  |
| 340             | 1.0               | 0.10          | 0.69        | 1.46                  |
| 350             | 1.0               | 0.07          | 0.79        | 1.46                  |

Table S5: Average lifetime, content, and free energy change of the conformers in  $\beta$ -D-mannose.

| Temperature [K] | Concentration [M] | Lifetime [ns] | Content [%] | $\Delta G$ [kcal/mol] |
|-----------------|-------------------|---------------|-------------|-----------------------|
| 298             | 0.1               | 0.02          | < 0.00      | 2.58                  |
| 298             | 0.5               | 0.01          | < 0.00      | 2.37                  |
| 298             | 1.0               | 0.01          | < 0.00      | 2.40                  |
| 310             | 1.0               | 0.01          | 0.01        | 2.46                  |
| 320             | 1.0               | 0.01          | 0.02        | 2.35                  |
| 330             | 1.0               | 0.01          | 0.03        | 2.31                  |
| 340             | 1.0               | 0.01          | 0.03        | 2.38                  |
| 350             | 1.0               | 0.01          | 0.04        | 2.36                  |

Table S6: Average lifetime, content, and free energy change of the conformers in  $\beta$ -D-galactose.

| Temperature [K] | Concentration [M] | Lifetime [ns] | Content [%] | $\Delta G$ [kcal/mol] |
|-----------------|-------------------|---------------|-------------|-----------------------|
| 298             | 0.1               | -             | -           | -                     |
| 298             | 0.5               | 0.02          | < 0.00      | 2.75                  |
| 298             | 1.0               | 0.19          | 0.03        | 2.09                  |
| 310             | 1.0               | 0.02          | 0.01        | 2.46                  |
| 320             | 1.0               | 0.02          | 0.01        | 2.54                  |
| 330             | 1.0               | 0.11          | 0.05        | 2.16                  |
| 340             | 1.0               | 0.18          | 0.14        | 1.93                  |
| 350             | 1.0               | 0.13          | 0.17        | 1.92                  |
